# Supplementary material for: Data-driven machine learning prediction of glass transition temperature and the glass-forming ability of metallic glasses
Source: Royal Society of Chemistry journal article supplement (doi:10.1039/d3nr04380k), 2023-01-01
Supplement: d3nr04380k1.pdf [file d3nr04380k1.pdf]

## Supporting Information

### Data-Driven Machine Learning Prediction of Glass Transition Temperature and Glass-Forming Ability for Metallic Glasses

*Jingzi Zhang<sup>a,b†</sup>, Mengkun Zhao<sup>a,b†</sup>, Chengquan Zhong<sup>a,b</sup>, Jiakai Liu<sup>a,b</sup>, Kailong  
Hu<sup>a,b,c\*</sup>, and Xi Lin<sup>a,b,c\*</sup>*

<sup>a</sup> School of Materials Science and Engineering, Harbin Institute of Technology,  
Shenzhen 518055, P. R. China

<sup>b</sup> Blockchain Development and Research Institute, Harbin Institute of Technology,  
Shenzhen 518055, P. R. China

<sup>c</sup> State Key Laboratory of Advanced Welding and Joining, Harbin Institute of  
Technology, Harbin 150001, P. R. China

† These authors contribute equally to this work.

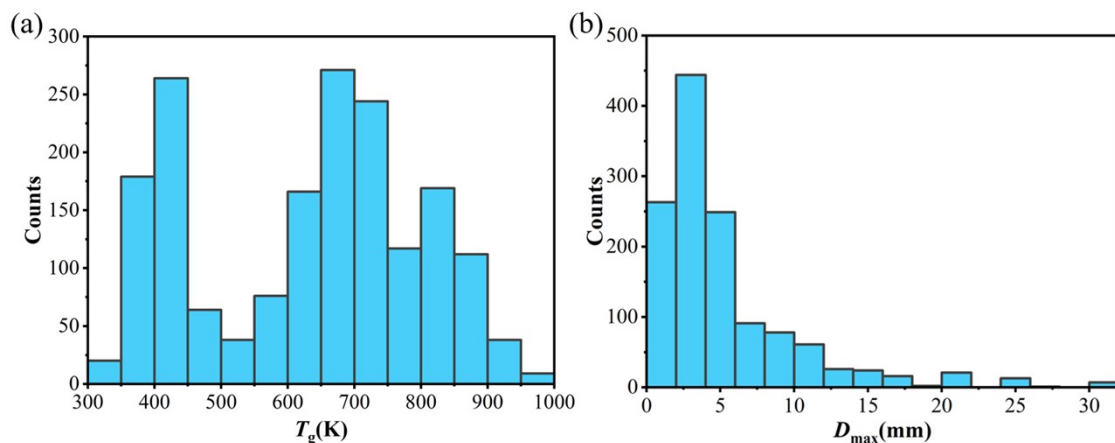

**Fig. S1** The overall distribution of (a)  $T_g$  and (b)  $D_{\max}$  values in dataset.

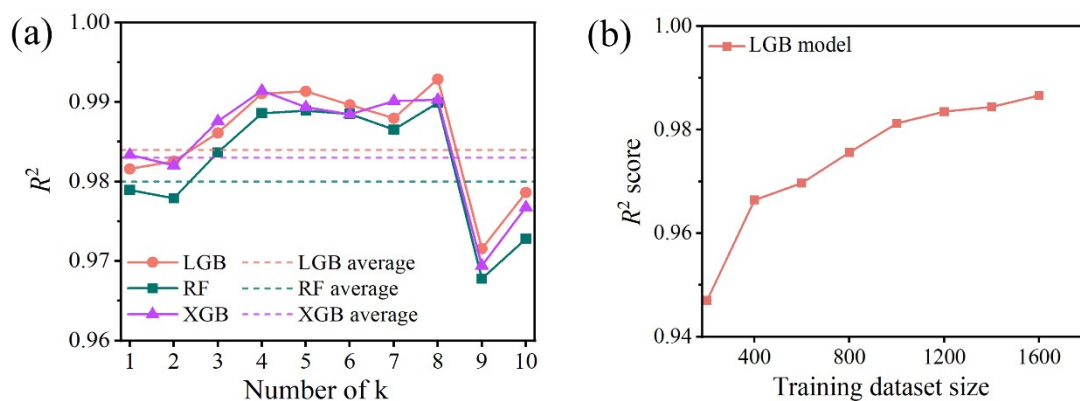

**Fig. S2** (a)  $R^2$  score of 10-fold cross-validation for three ML models on  $T_g$  dataset. (b)

Training dataset size dependences of the  $R^2$  score for ML model during  $T_g$  prediction.

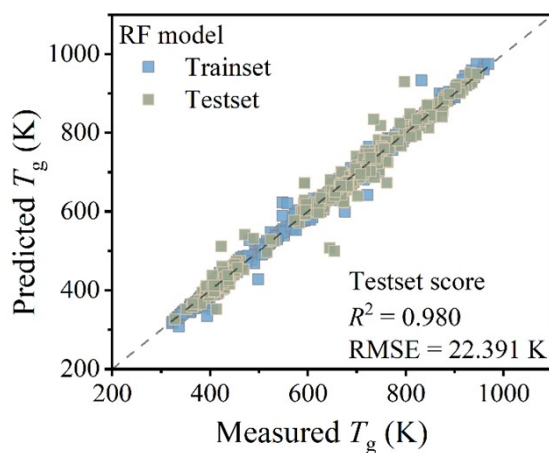

**Fig. S3** Comparison of predicted and measured  $T_g$  values using the RF model.

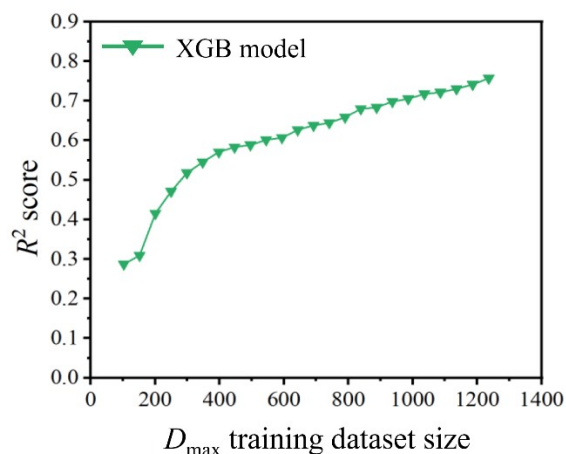

**Fig. S4** Training dataset size dependences of the  $R^2$  score for ML model during  $D_{\max}$  prediction.

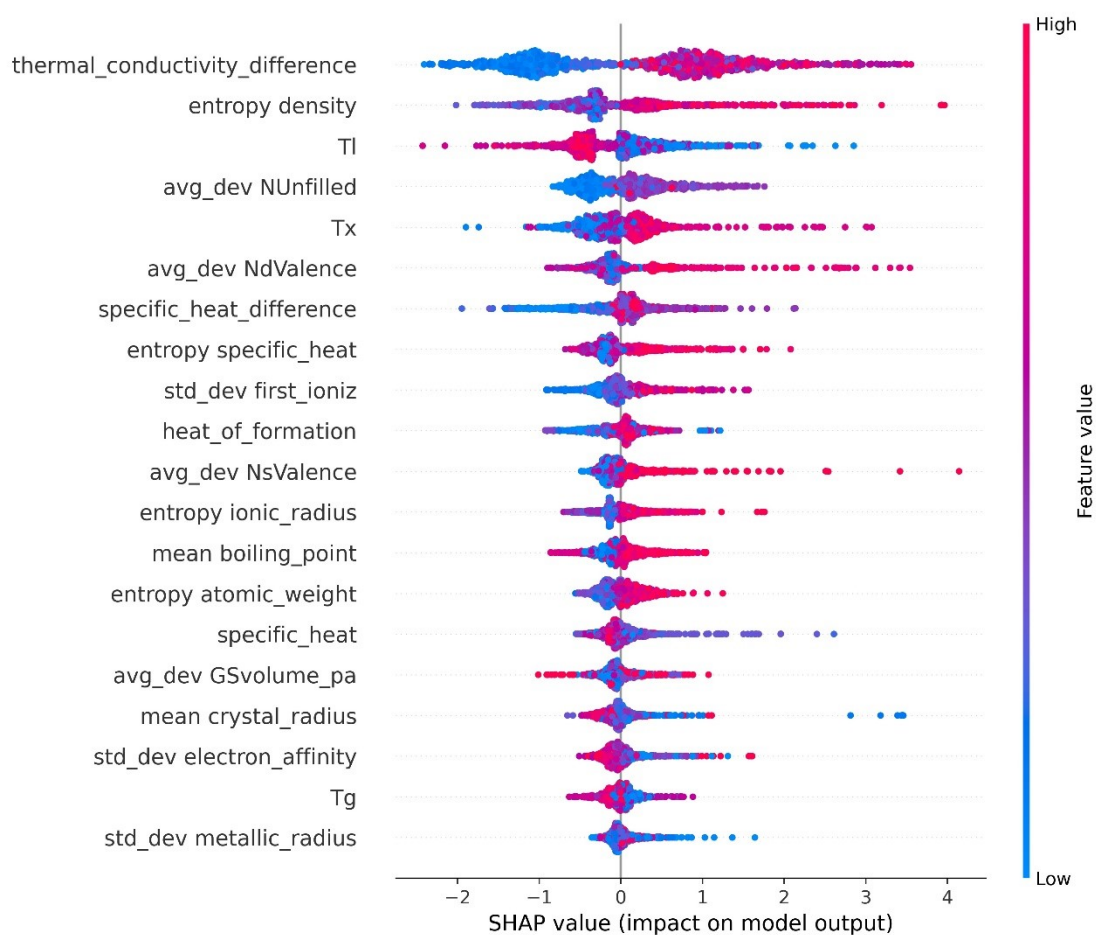

**Fig. S5** Feature importance based on SHAP value of XGBoost model, in order of increasing importance (i.e., the sum of SHAP value magnitudes). The color corresponds

to the value of each input feature and can demonstrate positive or negative correlation with  $D_{\max}$  values. Red and blue color mean the values of listed feature on each data point, respectively.

**Table S1.** Three main types of duplicate data in the merged dataset.

| Type                                                                                | Example                                                                                                                                                                                                                                      |
|-------------------------------------------------------------------------------------|----------------------------------------------------------------------------------------------------------------------------------------------------------------------------------------------------------------------------------------------|
| The chemical formulas of MGs are the same.                                          | $\text{Fe}_{36}\text{Co}_{36}\text{B}_{19.2}\text{Si}_{4.8}\text{Nb}_4$<br>$\text{Fe}_{36}\text{Co}_{36}\text{B}_{19.2}\text{Si}_{4.8}\text{Nb}_4$                                                                                           |
|                                                                                     | $\text{Fe}_{75}\text{C}_7\text{Si}_{3.3}\text{B}_5\text{P}_{8.7}\text{Ga}_1$                                                                                                                                                                 |
|                                                                                     | $\text{Fe}_{75.0}\text{C}_{7.0}\text{Si}_{3.3}\text{B}_{5.0}\text{P}_{8.7}\text{Ga}_{1.0}$ ;                                                                                                                                                 |
| The data format of the element composition in the chemical formula is inconsistent. | $(\text{Fe}_{75}\text{Co}_{25})_{83}\text{P}_{17}$<br>$(\text{Fe}_{0.75}\text{Co}_{0.25})_{83}\text{P}_{17}$ ;<br>$\text{Cu}_{43}\text{Zr}_{43}\text{Al}_{17}\text{Be}_7$<br>$(\text{Cu}_{0.5}\text{Zr}_{0.5})_{86}\text{Al}_7\text{Be}_7$ . |
| The order of the elements in the chemical formula is different.                     | $\text{Zr}_{63.5}\text{Al}_{10.7}\text{Cu}_{10.7}\text{Ni}_{15.1}$<br>$\text{Al}_{10.7}\text{Cu}_{10.7}\text{Ni}_{15.1}\text{Zr}_{63.5}$                                                                                                     |

**Table S2.** Calculation methods of element features in compounds. The “i” represents the element number of MGs. The “t” represents the property of element. The “p” represents the weighted score [1].

In the calculation of the weight entropy of mixing  $\omega = t_i/(t_1 + \dots + t_i)$ .

| <b>Features description</b> | <b>Computational formula</b>                                                                                                                                                                            |
|-----------------------------|---------------------------------------------------------------------------------------------------------------------------------------------------------------------------------------------------------|
| The average                 | $= \mu = (t_1 + \dots + t_i)/i$                                                                                                                                                                         |
| Weighted mean               | $= v = (p_1 \times t_1) + \dots + (p_i \times t_i)$                                                                                                                                                     |
| Geometric mean              | $= (t_1 \times \dots \times t_i)^{1/i}$                                                                                                                                                                 |
| Weighted geometric mean     | $= (t_1)^{p_1} \times \dots \times (t_i)^{p_i}$                                                                                                                                                         |
| The entropy of mixing       | $= -\omega_1 \ln(\omega_1) - \dots - \omega_i \ln(\omega_i)$                                                                                                                                            |
| Weighted entropy of mixing  | $= -\frac{p_1 \omega_1}{p_1 \omega_1 + \dots + p_i \omega_i} \ln\left(\frac{p_1 \omega_1}{p_1 \omega_1 + \dots + p_i \omega_i}\right) \dots - \frac{p_i \omega_i}{p_1 \omega_1 + \dots + p_i \omega_i}$ |
| Extreme value range         | $= t_1 - t_2 (t_1 > t_2)$                                                                                                                                                                               |
| Weighted range              | $= p_1 t_1 - p_2 t_2$                                                                                                                                                                                   |
| The standard deviation      | $= [(1/2)((t_1 - \mu)^2 + (t_2 - \mu)^2)]^{1/2}$                                                                                                                                                        |
| Weighted standard deviation | $= [p_1(t_1 - v)^2 + p_2(t_2 - v)^2]^{1/2}$                                                                                                                                                             |

**Table S3** The explication of 16 features selected for  $T_g$  model by RFE method.

| Features                       | Explanation                                           |
|--------------------------------|-------------------------------------------------------|
| mean melting point             | the mean value of melting point                       |
| std dev vdw radius             | the standard deviation value of vdw radius            |
| mean crystal radius            | the mean value of crystal radius                      |
| mean electronegativity         | the mean value of electronegativity                   |
| mean column                    | the mean value of columns in the periodic table       |
| Gmix                           | mixing Gibbs free energy                              |
| gmean ionic radius             | the geometric mean value of ionic radius              |
| std dev atomic volume          | the standard deviation value of atomic volume         |
| avg dev MendeleevNumber        | the average deviation value of MendeleevNumber        |
| mean NdValence                 | the mean value of $d$ atomical orbit electrons        |
| std dev melting point          | the standard deviation value of melting point         |
| std dev fusion heat            | the standard deviation value of fusion heat           |
| avg dev electronegativity      | the average deviation value of electronegativity      |
| gmean second ionisation energy | the geometric mean value of second ionisation energy  |
| std dev dipole polarizability  | the standard deviation value of dipole polarizability |
| std dev heat of formation      | the standard deviation value of heat of formation     |

**Table S4** The explication of 22 features selected for  $D_{\max}$  model by RFE method.

| <b>Features</b>                 | <b>Explanation</b>                                          |
|---------------------------------|-------------------------------------------------------------|
| thermal conductivity difference | the mismatch of thermal conductivity                        |
| avg_dev NdValence               | the average deviation value of $d$ atomical orbit electrons |
| entropy density                 | the entropy value of density                                |
| avg_dev Nunfilled               | the average deviation value of unfilled electrons           |
| std_dev specific heat           | the standard deviation value of specific heat               |
| avg_dev NsValence               | the average deviation value of $s$ atomical orbit electrons |
| specific heat difference        | the mismatch of specific heat                               |
| $T_x$                           | the crystallization temperature                             |
| entropy ionic radius            | the entropy value of ionic radius                           |
| mean crystal radius             | the mean value of crystal radius                            |
| entropy specific heat           | the entropy value of specific heat                          |
| std_dev electron affinity       | the standard deviation value of electron affinity           |
| std_dev first ioniz             | the standard deviation value of first ioniz                 |
| $T_l$                           | liquids temperature                                         |
| std_dev heat of formation       | the standard deviation value of heat of formation           |
| mean boiling point              | the mean value of boiling point                             |
| $T_g$                           | glass transition temperature                                |
| avg_dev GSvolume                | the average deviation value of ground state volume          |
| entropy atomic weight           | the entropy value of atomic weight                          |
| entropy classical valence       | the entropy value of classical valence                      |
| std_dev boiling point           | the standard deviation value of boiling point               |
| std_dev metallic radius         | the standard deviation value of metallic radius             |



**Table S5** The hyperparameter of the RF, XGBoost and LGB models.

| <b>Model</b> | <b>Parameter</b>  | <b>Value</b> |
|--------------|-------------------|--------------|
| RF           | n_estimators      | 500          |
|              | max_depth         | 17           |
|              | min_samples_split | 2            |
|              | max_features      | sqrt         |
| XGBoost      | n_estimators      | 180          |
|              | max_depth         | 10           |
|              | learning_rate     | 0.05         |
|              | min_child_weight  | 6            |
|              | colsample_bytree  | 0.68         |
|              | subsample         | 1.0          |
| LGB          | n_estimators      | 260          |
|              | max_depth         | 12           |
|              | num_leaves        | 20           |
|              | learning_rate     | 0.16         |

**Table S6** The predicted and measured  $D_{\max}$  values, thermal conductivity difference, and entropy density values of some samples.

| MGs                                                                                                           | Measured $D_{\max}$ (mm) | Predicted $D_{\max}$ (mm) | Thermal conductivity difference | Entropy density |
|---------------------------------------------------------------------------------------------------------------|--------------------------|---------------------------|---------------------------------|-----------------|
| Zr <sub>42</sub> Ni <sub>6</sub> Cu <sub>36</sub> Al <sub>8</sub> Ag <sub>8</sub>                             | 25                       | 22.3                      | 0.85                            | 1.26            |
| Zr <sub>48</sub> Pd <sub>4</sub> Cu <sub>32</sub> Al <sub>8</sub> Ag <sub>8</sub>                             | 25                       | 24                        | 0.93                            | 1.25            |
| Zr <sub>44</sub> Pd <sub>4</sub> Cu <sub>36</sub> Al <sub>8</sub> Ag <sub>8</sub>                             | 25                       | 23.1                      | 0.87                            | 1.24            |
| Zr <sub>46</sub> Ni <sub>2</sub> Cu <sub>36</sub> Al <sub>8</sub> Ag <sub>8</sub>                             | 25                       | 21.7                      | 0.87                            | 1.17            |
| Zr <sub>48</sub> Ni <sub>2</sub> Cu <sub>34</sub> Al <sub>8</sub> Ag <sub>8</sub>                             | 25                       | 20.5                      | 0.90                            | 1.17            |
| Zr <sub>48</sub> Ni <sub>6</sub> Cu <sub>30</sub> Al <sub>8</sub> Ag <sub>8</sub>                             | 25                       | 20.5                      | 0.94                            | 1.27            |
| (Ti <sub>0.41</sub> Zr <sub>0.25</sub> Be <sub>0.26</sub> Ni <sub>0.08</sub> ) <sub>98</sub> Cu <sub>2</sub>  | 25                       | 21                        | 1.11                            | 1.37            |
| Zr <sub>46</sub> Pd <sub>2</sub> Cu <sub>36</sub> Al <sub>8</sub> Ag <sub>8</sub>                             | 30                       | 27.4                      | 0.87                            | 1.19            |
| Zr <sub>48</sub> Pd <sub>2</sub> Cu <sub>34</sub> Ag <sub>8</sub> Al <sub>8</sub>                             | 30                       | 25.3                      | 0.91                            | 1.19            |
| Zr <sub>48</sub> Ni <sub>4</sub> Cu <sub>32</sub> Al <sub>8</sub> Ag <sub>8</sub>                             | 30                       | 20.5                      | 0.92                            | 1.23            |
| Zr <sub>44</sub> Ni <sub>4</sub> Cu <sub>36</sub> Al <sub>8</sub> Ag <sub>8</sub>                             | 30                       | 26.3                      | 0.86                            | 1.22            |
| (Ti <sub>0.41</sub> Zr <sub>0.25</sub> Be <sub>0.26</sub> Ni <sub>0.08</sub> ) <sub>96</sub> Cu <sub>4</sub>  | 30                       | 23.9                      | 1.14                            | 1.43            |
| (Ti <sub>0.41</sub> Zr <sub>0.25</sub> Be <sub>0.26</sub> Ni <sub>0.08</sub> ) <sub>94</sub> Cu <sub>6</sub>  | 30                       | 26.7                      | 1.15                            | 1.46            |
| (Ti <sub>0.41</sub> Zr <sub>0.25</sub> Be <sub>0.26</sub> Ni <sub>0.08</sub> ) <sub>90</sub> Cu <sub>10</sub> | 30                       | 20.3                      | 1.15                            | 1.50            |

Utilizing the SISO method, we have selected eight critical features from the SHAP importance features to establish a formulaic relationship with  $D_{\max}$ , resulting in a correlation coefficient ( $r$ ) of 0.687—exceeding the 0.672 reported in Xiong's work [2]. The formulation of feature equations facilitates a more intuitive exploration of the connection between  $D_{\max}$  and these pivotal features, thereby providing fresh insights into the design of metallic glasses with enhanced  $D_{\max}$ .

$$D_{\max} = 0.64D_1 + 0.482D_2 + 0.339D_3 + 3.777 \quad (1)$$

$$D_1 = (X_1^2 + X_6^2)(X_1 + X_3) \exp(X_1) \quad (2)$$

$$D_2 = (X_6 - X_2)(X_0 + X_6) - X_4^2 \exp\left(\frac{X_6}{X_4}\right) \quad (3)$$

$$D_3 = \frac{\exp\left(\frac{X_1}{X_5}\right)(X_1 + X_6)}{\frac{X_1}{X_5} + \frac{X_7}{X_3}} \quad (4)$$

where the  $X_1$  is the mean deviation of unfilled electrons;  $X_2$  is the range value of thermal conductivity;  $X_3$  is the thermal conductivity difference;  $X_4$  is the entropy of first ionization energy;  $X_5$  is the standard deviation of thermal conductivity;  $X_6$  is the average deviation of  $d$  atomical orbit electrons;  $X_7$  is the standard deviation of specific heat;

## Reference

- [1] Hamidieh K. A data-driven statistical model for predicting the critical temperature of a superconductor. *Computational Materials Science*, 2018, 154: 346-354.
- [2] Xiong, J., Shi, S.-Q., Zhang, T.-Y. A Machine-Learning Approach to Predicting and Understanding the Properties of Amorphous Metallic Alloys. *Mater. Des.* 2020, 187, 108378.
